# Supplementary material for: Impact of Cuproptosis-related markers on clinical status, tumor immune microenvironment and immunotherapy in colorectal cancer: A multi-omic analysis
Source: PubMed Central journal article supplement — Comput Struct Biotechnol J. 2023 Jun 13;21:3383–403. doi: 10.1016/j.csbj.2023.06.011 (PMC10300104; doi:10.1016/j.csbj.2023.06.011), 2023-06-13
Supplement: mmc1.pdf [file mmc1.pdf]

## Supplemental Tables

**Table S1 The full name, function of the 16 CPRMs**

| <b>Gene</b> | <b>Full Name</b>                                | <b>Function</b>                                                                                                                                                                                                                                                                                                                                             |
|-------------|-------------------------------------------------|-------------------------------------------------------------------------------------------------------------------------------------------------------------------------------------------------------------------------------------------------------------------------------------------------------------------------------------------------------------|
| ATP7A       | ATPase Copper Transporting Alpha                | This gene encodes a transmembrane protein that functions in copper transport across membranes, which has been found to be involved in the resistance of colorectal cancer to oxaliplatin.                                                                                                                                                                   |
| ATP7B       | ATPase Copper Transporting Beta                 | This protein is a monomer, and functions as a copper-transporting ATPase which exports copper out of the cells, such as the efflux of hepatic copper into the bile. Researches have shown this protein plays a role in the development of resistance to oxaliplatin in colorectal cancer.                                                                   |
| CDKN2A      | Cyclin Dependent Kinase Inhibitor 2A            | This gene encodes a 156 amino acid, 16kD cell-cycle inhibitor protein, which normally blocks abnormal cell growth and proliferation by binding to complexes of cyclin-dependent kinases (CDK) 4 and 6, and cyclin D. This binding inhibits the kinase activity of the enzyme, which arrests the cell cycle in the G1 phase.                                 |
| DBT         | Dihydrolipoamide Branched Chain Transacylase E2 | This gene encodes the transacylase (E2) subunit of branched-chain alpha-keto acid dehydrogenase complex (BCKD) which is an inner-mitochondrial enzyme complex involved in the breakdown of the branched-chain amino acids isoleucine, leucine, and valine.                                                                                                  |
| DLAT        | Dihydrolipoamide S-acetyltransferase            | This gene encodes component E2 of the multi-enzyme pyruvate dehydrogenase complex (PDC), which accepts acetyl groups formed by the oxidative decarboxylation of pyruvate and transfers them to coenzyme A. It is involved in mediating carbon entry to the TCA cycle.                                                                                       |
| DLD         | Dihydrolipoamide Dehydrogenase                  | The encoded protein has been identified as a moonlighting protein based on its ability to perform mechanistically distinct functions. In homodimeric form, the encoded protein functions as a dehydrogenase and is found in several multi-enzyme complexes that regulate energy metabolism. However, as a monomer, this protein can function as a protease. |
| DLST        | Dihydrolipoamide S-succinyltransferase          | This gene encodes a mitochondrial protein which is one of the three components (the E2 component) of the 2-oxoglutarate dehydrogenase complex that catalyzes the overall conversion of 2-oxoglutarate to succinyl-CoA and CO(2), which is required for lysine succinylation of histones.                                                                    |
| FDX1        | Ferredoxin 1                                    | Transfers electrons from NADPH through ferredoxin reductase to mitochondrial cytochrome P450, involved in steroid, vitamin D, and bile acid metabolism.                                                                                                                                                                                                     |
| GCSH        | Glycine Cleavage System Protein H               | The protein encoded by this gene is the H protein, a component of glycine cleavage system, which transfers the methylamine group of glycine from the P protein to the T protein                                                                                                                                                                             |
| GLS         | Glutaminase                                     | This gene encodes the K-type mitochondrial glutaminase. The encoded protein is an phosphate-activated amidohydrolase that catalyzes the hydrolysis of glutamine to glutamate and ammonia, which is an essential step in the metabolism of glutamine in colorectal cancer cells.                                                                             |

|         |                                           |                                                                                                                                                                                                                                                                                                                                               |
|---------|-------------------------------------------|-----------------------------------------------------------------------------------------------------------------------------------------------------------------------------------------------------------------------------------------------------------------------------------------------------------------------------------------------|
| LIAS    | Lipoic Acid Synthetase                    | Catalyzes the final step in the de novo pathway for the biosynthesis of lipoic acid, a potent antioxidant.                                                                                                                                                                                                                                    |
| LIPT1   | Lipoyltransferase 1                       | Transfers the lipoyl moiety to apoproteins which is the second step of the process of transferring lipoic acid to proteins.                                                                                                                                                                                                                   |
| MTF1    | Metal Regulatory Transcription Factor 1   | This gene encodes a transcription factor that induces expression of metallothioneins and other genes involved in metal homeostasis in response to heavy metals such as cadmium, zinc, copper, and silver.                                                                                                                                     |
| PDHA1   | Pyruvate Dehydrogenase E1 Subunit Alpha 1 | This gene encodes the E1 alpha 1 subunit containing the E1 active site, and plays a key role in the function of the PDH complex which provides the primary link between glycolysis and the tricarboxylic acid (TCA) cycle.                                                                                                                    |
| PDHB    | Pyruvate Dehydrogenase E1 Subunit Beta    | This gene encodes beta subunit of the E1 enzyme. The protein is a component of the pyruvate dehydrogenase (PDH) complex, which provides the primary link between glycolysis and the tricarboxylic acid (TCA) cycle.                                                                                                                           |
| SLC31A1 | Solute Carrier Family 31 Member 1         | The gene product is a copper transporter located in the cell membrane, with high binding affinity. Overexpression of this gene may result in elevated intracellular accumulation of oxaliplatin in the dorsal root ganglia, which increases the susceptibility of colorectal cancer patients to oxaliplatin-induced peripheral neurotoxicity. |

**Table S2 The clinical characteristics of the individuals in our transcriptome cohort**

| Patients | Age | Gender | Vessel embolus | Nerve invasion | Cancerous node | EGFR | pTNM    | TNM Stage | CuproScore | Group |
|----------|-----|--------|----------------|----------------|----------------|------|---------|-----------|------------|-------|
| 1        | 69  | male   | (-)            | (-)            | (-)            | (±)  | T3N0M0  | II        | 0.692437   | Low   |
| 2        | 58  | male   | (-)            | (-)            | (-)            | (+)  | T3N2aM1 | IV        | 2.00655    | High  |
| 3        | 68  | male   | (-)            | (-)            | (-)            | (-)  | T3N0M0  | II        | 0.972819   | High  |
| 4        | 57  | male   | (-)            | (-)            | (-)            | (+)  | T3N0M0  | II        | 1.493446   | High  |
| 5        | 56  | female | (-)            | (+)            | (+)            | (+)  | T3N0M0  | II        | -1.45930   | Low   |
| 6        | 38  | male   | (-)            | (-)            | (-)            | (+)  | T3N0M0  | II        | 0.921751   | Low   |
| 7        | 56  | male   | (-)            | (-)            | (-)            | (+)  | T3N0M0  | II        | -11.7853   | Low   |
| 8        | 50  | male   | (-)            | (-)            | (-)            | (+)  | T3N0M0  | II        | 0.490920   | Low   |
| 9        | 66  | male   | (-)            | (-)            | (-)            | (+)  | T3N0M0  | II        | 2.078367   | High  |
| 10       | 56  | male   | (-)            | (-)            | (-)            | (+)  | T3N1M0  | III       | 1.654392   | High  |
| 11       | 47  | female | (+)            | (-)            | (-)            | (+)  | T2N2bM0 | III       | 0.109704   | Low   |
| 12       | 72  | female | (-)            | (-)            | (-)            | (±)  | T3N1M0  | III       | 2.824237   | High  |
| 13       | 70  | female | (+)            | (+)            | (-)            | (+)  | T3N1M0  | III       | -2.24821   | Low   |
| 14       | 67  | male   | (-)            | (-)            | (-)            | (+)  | T2N2M0  | III       | -0.26896   | Low   |
| 15       | 71  | male   | (+)            | (-)            | (+)            | (+)  | T4N2aM1 | IV        | 4.256269   | High  |

**Table S3 Real-time PCR primer sequences of 16 CPRMs**

| <b>Name</b> | <b>Description</b> | <b>Primer Sequences (5' to 3')</b> |
|-------------|--------------------|------------------------------------|
| ATP7B(F)    | Forward Primer     | GGCCGTCATCACTTATCAGCC              |
| ATP7B(R)    | Reverse Primer     | GGGAGCCACTTTGCTCTTGA               |
| SLC31A1(F)  | Forward Primer     | GGGGATGAGCTATATGGACTCC             |
| SLC31A1(R)  | Reverse Primer     | TCACCAAACCGGAAAACAGTAG             |
| DLST(F)     | Forward Primer     | GAACTGCCCTCTAGGGAGAC               |
| DLST(R)     | Reverse Primer     | AACCTTCCTGCTGTTAGGGTA              |
| GCSH(F)     | Forward Primer     | GGAAGCGTTGGGAGATGTTGT              |
| GCSH(R)     | Reverse Primer     | TCTGAAGGGTTACTCAGTGTCA             |
| DBT(F)      | Forward Primer     | CAGTTCGCCGTCTGGCAAT                |
| DBT(R)      | Reverse Primer     | CCTGTGAATACCGGAGGTTTTG             |
| ATP7A(F)    | Forward Primer     | TGACCCTAAACTACAGACTCCAA            |
| ATP7A(R)    | Reverse Primer     | CGCCGTAACAGTCAGAAACAA              |
| FDX1(F)     | Forward Primer     | GCCTCTTTGGAGTCTCTCGC               |
| FDX1(R)     | Reverse Primer     | CCCAACCGTGATCTGTCTGT               |
| LIAS(F)     | Forward Primer     | CAGCCCAGTCAGACCGTTAAG              |
| LIAS(R)     | Reverse Primer     | TTTCTGGCGTTTTAGGTTTCCT             |
| LIPT1(F)    | Forward Primer     | CCTCTGTTGTAATTGGTAGGCAT            |
| LIPT1(R)    | Reverse Primer     | CTGGGGTTGGACAGCATTACAG             |
| DLD(F)      | Forward Primer     | CTCATGGCCTACAGGGACTTT              |
| DLD(R)      | Reverse Primer     | GCATGTTCCACCAAGTGTTCAT             |
| DLAT(F)     | Forward Primer     | CGGAACTCCACGAGTGACC                |
| DLAT(R)     | Reverse Primer     | CCCCGCCATACCCTGTAGT                |
| PDHA1(F)    | Forward Primer     | TGGTAGCATCCCGTAATTTTGC             |
| PDHA1(R)    | Reverse Primer     | ATTCGGCGTACAGTCTGCATC              |
| PDHB(F)     | Forward Primer     | AAGAGGCGCTTTCCTACTGGAC             |
| PDHB(R)     | Reverse Primer     | ACTAACCTTGTATGCCCCATCA             |
| MTF1(F)     | Forward Primer     | CACAGTCCAGACAACAACATCA             |
| MTF1(R)     | Reverse Primer     | GCACCAGTCCGTTTTTATCCAC             |
| GLS(F)      | Forward Primer     | TCTACAGGATTGCGAACGTCT              |
| GLS(R)      | Reverse Primer     | CTTTGTCTAGCATGACACCATCT            |
| CDKN2A(F)   | Forward Primer     | GATCCAGGTGGGTAGAAGGTC              |
| CDKN2A(R)   | Reverse Primer     | CCCCTGCAAACCTTCGTCCT               |
